# Supplementary material for: Strain-induced tunable valley polarization and topological phase transition in SVSiN2 monolayer
Source: Royal Society of Chemistry journal article supplement (doi:10.1039/d3tc04759h), 2024-01-01
Supplement: d3tc04759h1.pdf [file d3tc04759h1.pdf]

# Strain-induced tunable valley polarization and topological phase transition in SVSiN<sub>2</sub> monolayer

Yunxi Qi, Can Yao and Jun Zhao\*

*Jiangsu Provincial Engineering Research Center of Low Dimensional Physics and New Energy & School of Science, Nanjing University of Posts and Telecommunications, Nanjing, Jiangsu 210023, China*

Hui Zeng<sup>†</sup>

*School of Microelectronics, Nanjing University of Science and Technology, Nanjing, Jiangsu 210094, China<sup>‡</sup>*

*Authors to whom correspondence should be addressed: [zhaojun@njupt.edu.cn](mailto:zhaojun@njupt.edu.cn) (Jun Zhao) and [zenghui@njust.edu.cn](mailto:zenghui@njust.edu.cn) (Hui Zeng)*

Table S1 The lattice constant of the SVSiN<sub>2</sub> monolayer, V-N bond length  $R_{V-N}$ , V-S bond length  $R_{V-S}$ , layer thickness  $h$ , and PBE bandgap without SOC.

| SVSiN <sub>2</sub>        | $a=b$ (Å) | $R_{V-N}$ (Å) | $R_{V-S}$ (Å) | $h$ (Å) | $E_g$ (eV) |
|---------------------------|-----------|---------------|---------------|---------|------------|
| without dipole correction | 2.952     | 2.02          | 2.34          | 4.95    | 0.53       |
| With dipole correction    | 2.952     | 2.02          | 2.33          | 4.94    | 0.52       |

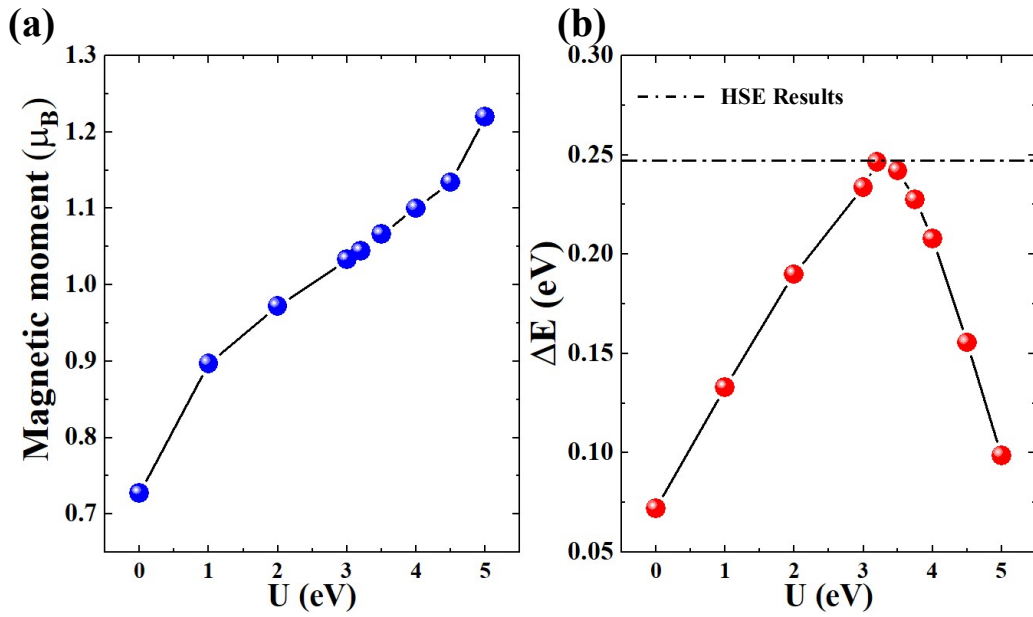

Fig S1. The (a) local magnetic moment of the V ions, and (b) the energy difference between AFM and FM configurations of the SVSiN<sub>2</sub> monolayer with respect to the different  $U_{\text{eff}}$  values.

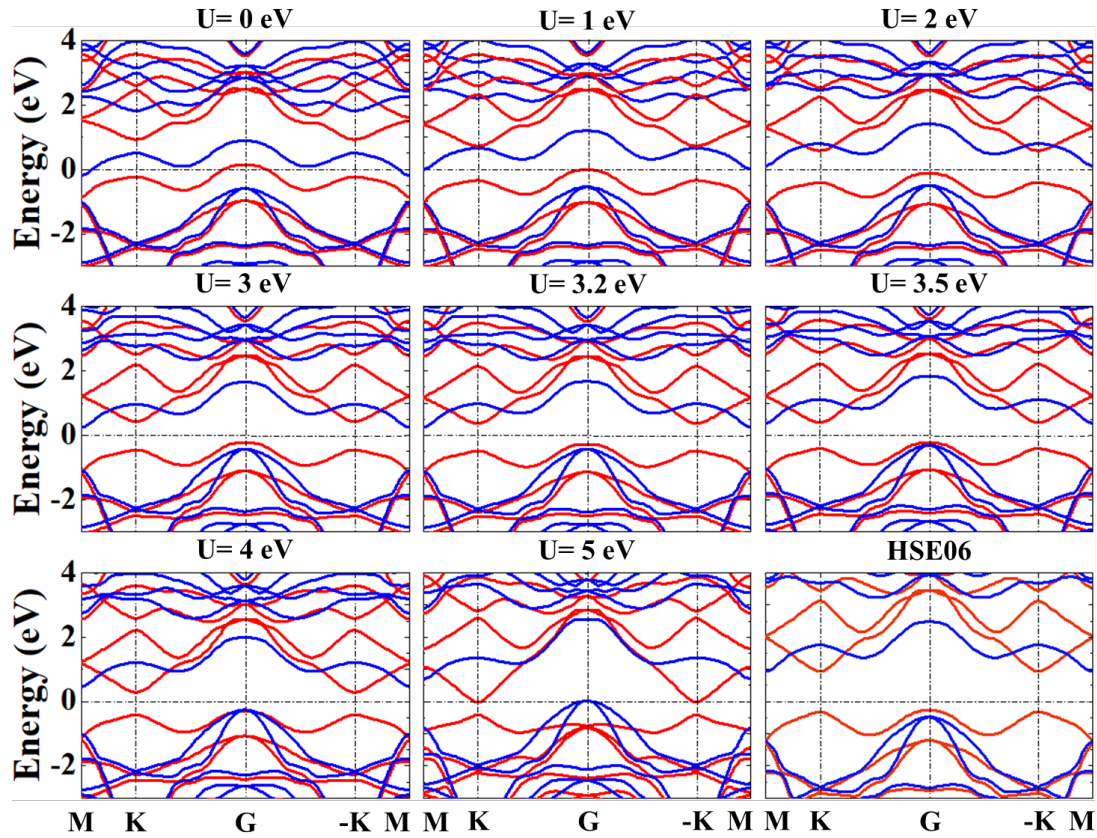

Fig S2. Band structures of the SVSiN<sub>2</sub> monolayer by using different  $U_{\text{eff}}$  values and by using HSE06 hybrid functional.

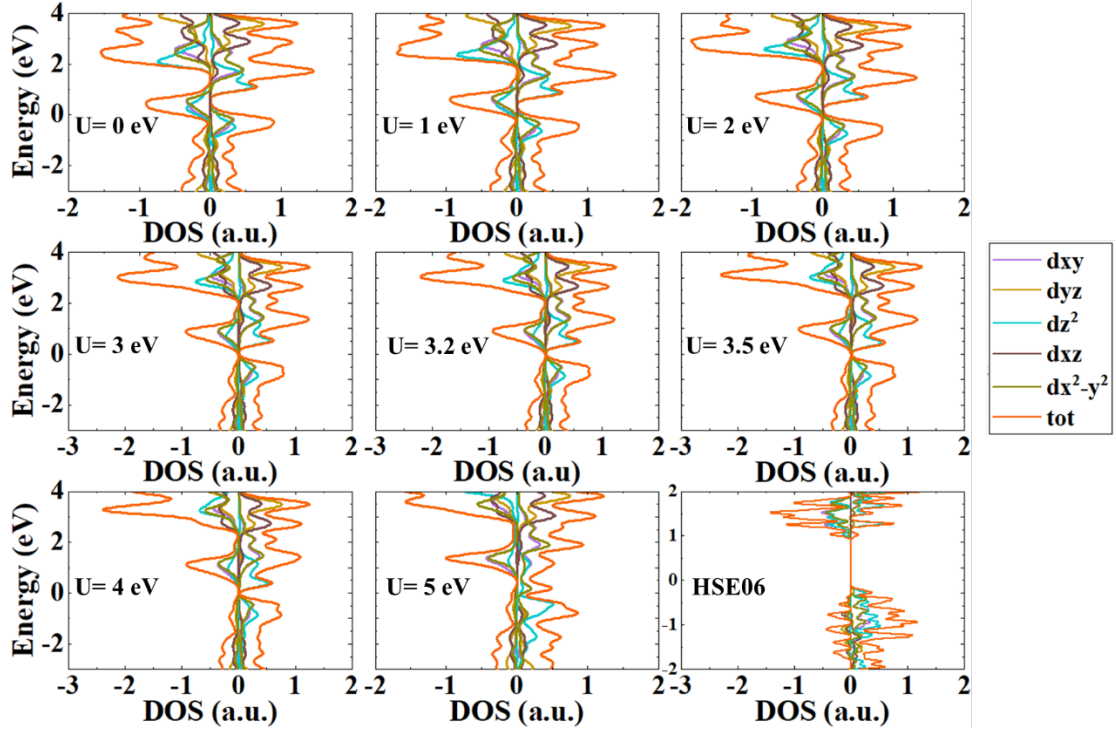

Fig S3. Projected density of state of the SVSiN<sub>2</sub> monolayer by using different  $U_{\text{eff}}$  values and by using HSE06 hybrid functional.

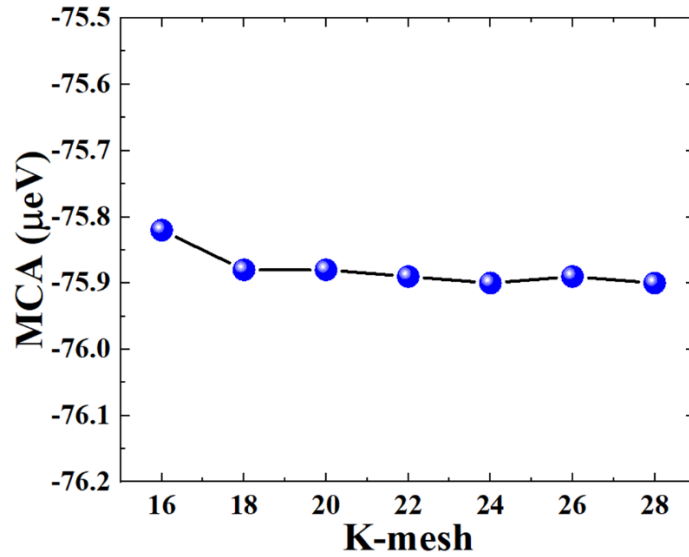

Fig S4. Magnetic crystal anisotropy (MCA) performance of the SVSiN<sub>2</sub> monolayer under different  $k$ -grids.

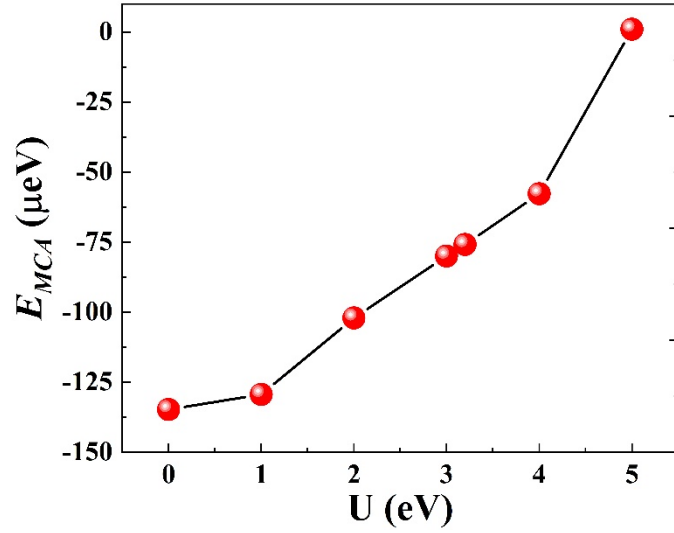

Fig. S5 The  $E_{MCA}$  of the SVSiN<sub>2</sub> monolayer as a function of different  $U_{\text{eff}}$  values.

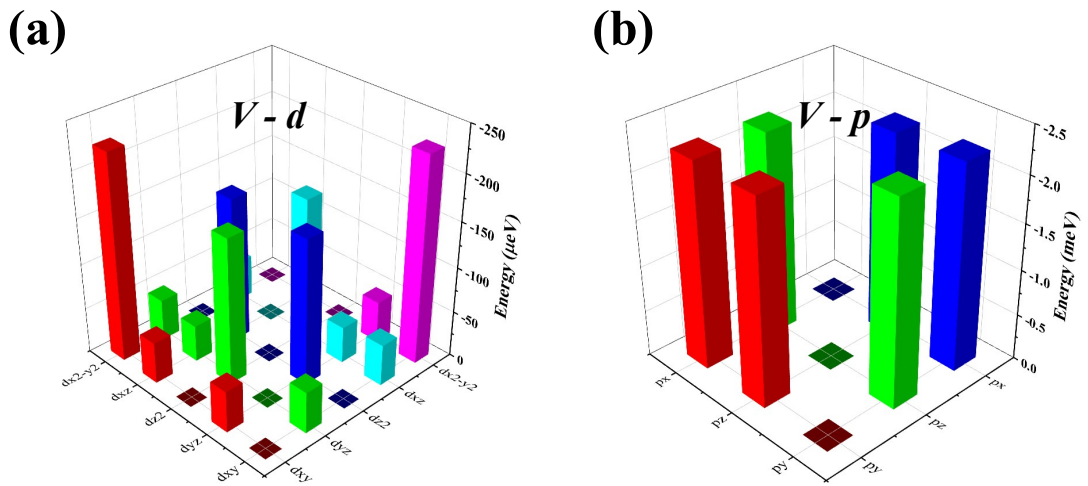

Fig S6. The orbital-resolved spin orbit coupling (SOC) energy difference of V atoms in the SVSiN<sub>2</sub> monolayer, where (a) is the V-*d* orbital, and (b) is the V-*p* orbital. All orbitals are beneficial for in-plane MCA.

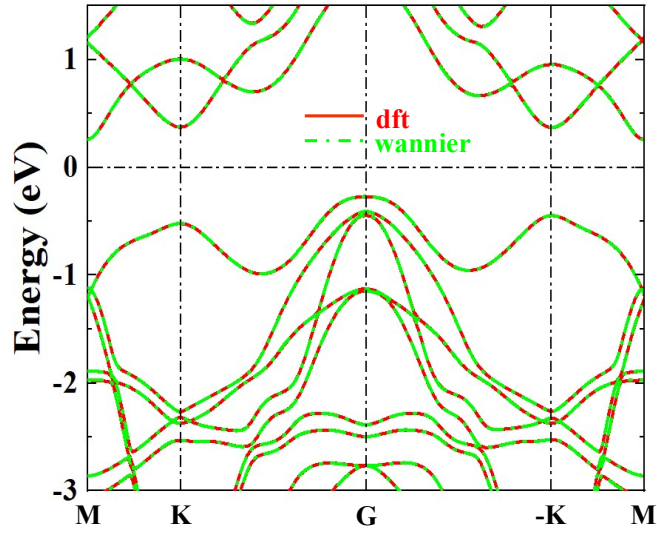

Fig S7. The band structure of the SVSiN<sub>2</sub> monolayer calculated by first principles (solid red line) and tight-binding method implemented by WANNIER90 (green dotted line).

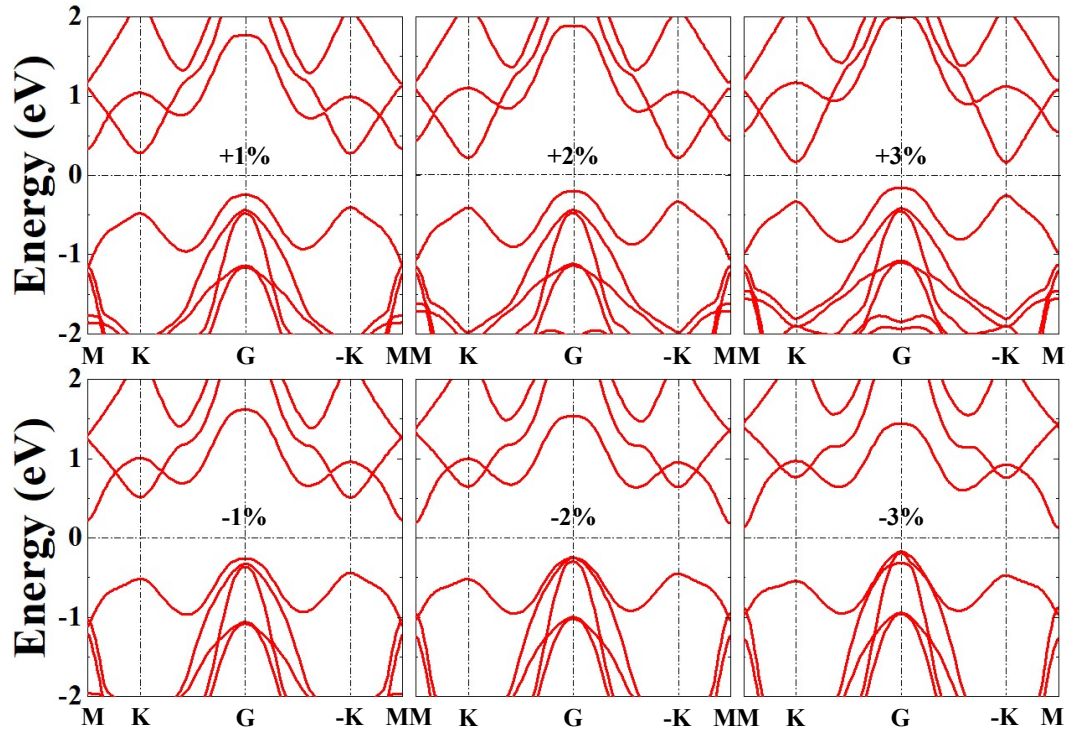

Fig S8. The band structures of the SVSiN<sub>2</sub> monolayer under different in-plane biaxial strains.



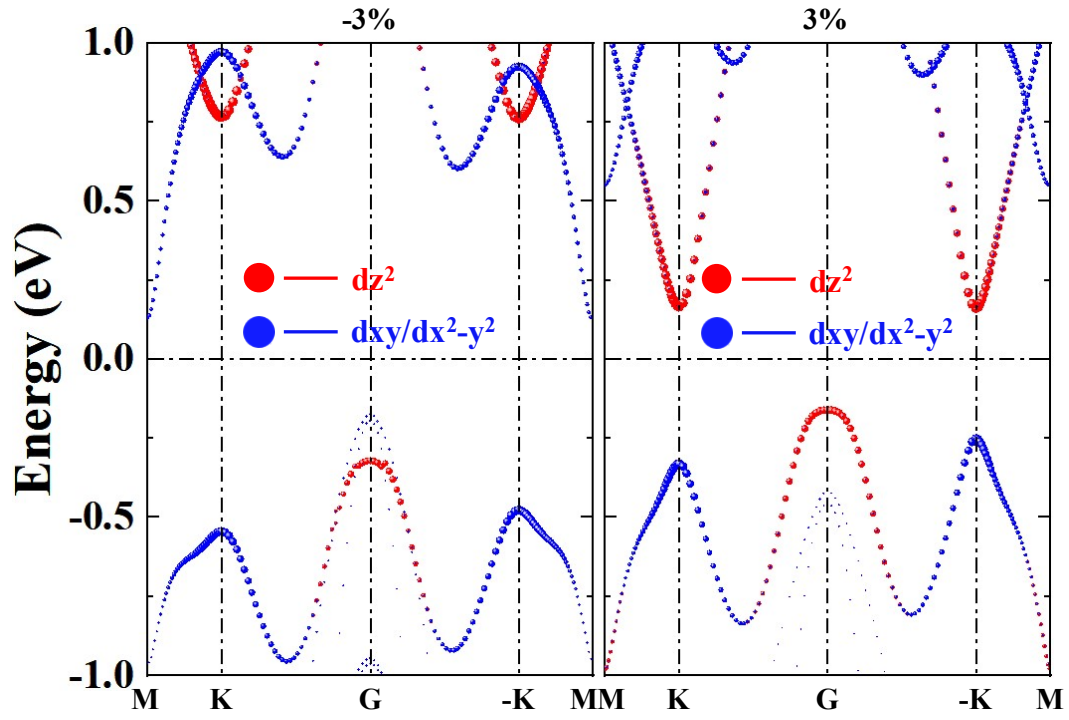

Fig S9. The projected band structures of the SVSiN<sub>2</sub> monolayer under -3% and 3% biaxial strain.

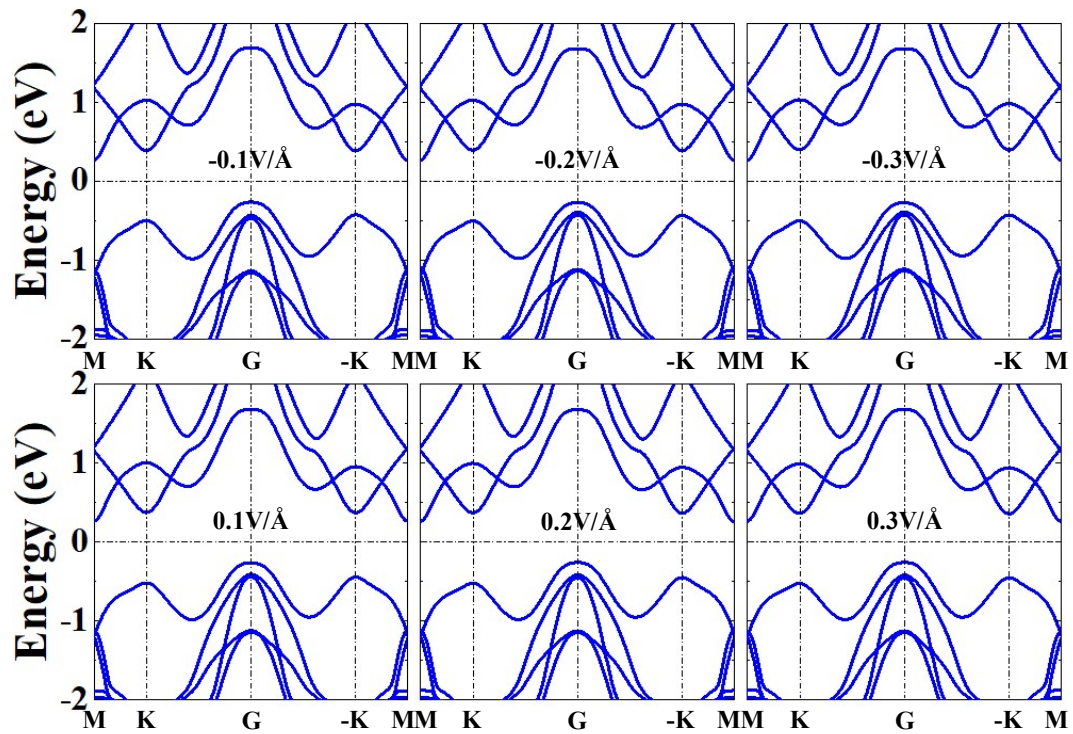

Fig S10. The band structures of the SVSiN<sub>2</sub> monolayer under different vertical electric fields.
